# Supplementary material for: Chemometric analysis of integrated FTIR and Raman spectra obtained by non-invasive exfoliative cytology for the screening of oral cancer
Source: Royal Society of Chemistry journal article supplement (doi:10.1039/c8an02092b), 2018-11-26
Supplement: c8an02092b2.pdf [file c8an02092b2.pdf]

Electronic Supplementary Material (ESI) for Analysis

This journal is © The Royal Society of Chemistry 2018
