# Supplementary material for: Chemometric analysis of integrated FTIR and Raman spectra obtained by non-invasive exfoliative cytology for the screening of oral cancer
Source: Royal Society of Chemistry journal article supplement (doi:10.1039/c8an02092b), 2018-11-26
Supplement: c8an02092b4.pdf [file c8an02092b4.pdf]

**Supplementary Table:** List of volunteers with cigarette smoking habit and classification of their spectral information through chemometric analysis

| Patient ID<br>(CS) | FTIR |                     | Raman |                     | FTIR-Raman |                     |
|--------------------|------|---------------------|-------|---------------------|------------|---------------------|
|                    | HV   | Diseased<br>(PC+CP) | HV    | Diseased<br>(PC+CP) | HV         | Diseased<br>(PC+CP) |
| P1821              |      | ✓                   |       | ✓                   |            | ✓                   |
| P1822              | ✓    |                     |       | ✓                   | ✓          |                     |
| P1819              |      |                     |       | ✓                   |            |                     |
| P1829              |      |                     | ✓     |                     |            |                     |
| P17129             |      |                     |       | ✓                   |            |                     |
| P1851              | ✓    |                     |       |                     | ✓          |                     |
| P1852              |      | ✓                   |       |                     |            | ✓                   |
| P1853              |      | ✓                   |       |                     | ✓          |                     |
| P1854              | ✓    |                     |       |                     |            |                     |
