# Supplementary figures and images for: Chemometric analysis of integrated FTIR and Raman spectra obtained by non-invasive exfoliative cytology for the screening of oral cancer
Source: Royal Society of Chemistry journal article supplement (doi:10.1039/c8an02092b), 2018-11-26

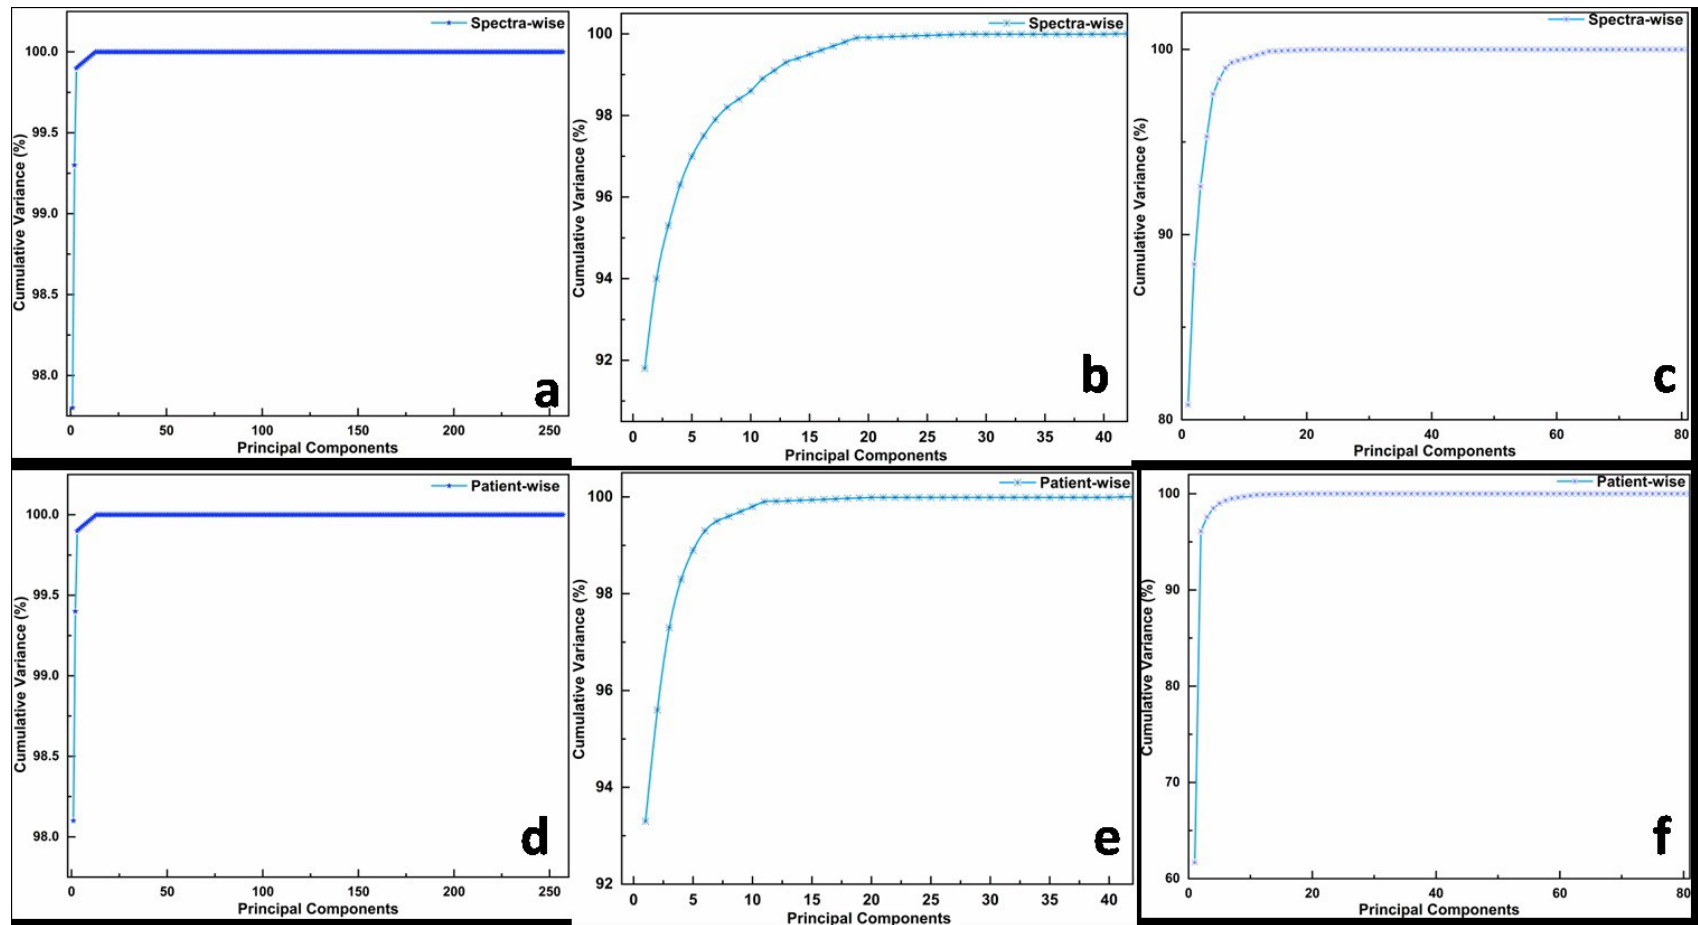

Supplement: c8an02092b6.pdf [file c8an02092b6.pdf]
